# Supplementary material for: Enhanced tumor targeting and timely viral release of mesenchymal stem cells/oncolytic virus complex due to GRP78 and inducible E1B55K expressions greatly increase the antitumor effect of systemic treatment
Source: PubMed Central journal article supplement (PMC9539630; doi:10.1016/j.omto.2022.09.004), 2022-09-17
Supplement: mmc1.pdf [file mmc1.pdf]

OMTO, Volume 27

## **Supplemental information**

**Enhanced tumor targeting and timely viral release of mesenchymal stem cells/oncolytic virus complex due to GRP78 and inducible E1B55K expressions greatly increase the antitumor effect of systemic treatment**

**Soojin Choi, Jeong A. Hong, Hye Jin Choi, and Jae J. Song**

**Table S1 List of PCR primers for subcloning**

| Vector Name               | Forward sequence                            | Reverse sequence                             |
|---------------------------|---------------------------------------------|----------------------------------------------|
| pVAX1-3484-RFP            | CCGGGTCGACGACATTGATT                        | GATTGTCGACCCATAGAGCC                         |
| pcDNA3.1-Hygro-E1B55K     | GCGGATCCATGGAGCGAAGAAACCCATCT               | GAGCGGCCGCTCAATCTGTATCTTCATCGCT              |
| pFlag-CMV2-E4orf6         | GTACAAGCTTATGACTACGTCCGGCGTTCC              | CACCTCTAGACTACATGGGGGTAGAGTCAT               |
| pCA14-E1B55K              | TTCATCTAGAATGGAGCGAAGAAACCCATC              | GACGAAGCTTTCAATCTGTATCTTCATCGC               |
| pcDNA3.1-Hygro-GRP78      | GATTCTCGAGATGAAGCTCTCCCTGG                  | GGCCTCTAGACTACAACCTCATCTTTT                  |
| pRetro-Tetone-Puro-E1B55K | CCTCGTAAAGAATTCATGGAGCGAAGAAACC<br>CATCTGAG | GAGGTGGTCTGGATCCTCAATCTGTATCTTCAT<br>CGCTAGA |

**Table S2 List of qRT-PCR primers**

| Primer name      | Forward sequence          | Reverse sequence       |
|------------------|---------------------------|------------------------|
| Vimentin         | TGGATTCACCTCCCTCTGGTT     | GGTCATCGTGATGCTGAGAA   |
| $\beta$ -catenin | TCTGAGGACAAGCCACAAGATTACA | TGGGCACCAATATCAAGTCCAA |
| HDAC6            | AAGAAGACCTAATCGTGGGACT    | GCTGTGAACCAACATCAGCTC  |
| Daxx             | GACGGACATTTCTCTTCCA       | TCTCATGCACTGACCTTTGC   |
| Akt1             | TCCTCCTCAAGAATGATGGCA     | GTGCGTTTCGATGACAGTGGT  |
| MAPKAPK2         | CAGCAGTTCCCGCAGTTC        | CGAATTTCTCCTGGGTCTC    |
| PTEN             | ACCAGAGACAAAAAGGGAGTA     | ACCACAACTGAGGATTGCA    |
| TRAF6            | CCTTTGGCAAATGTCATCTGTG    | CTCTGCATCTTTTCATGGCAAC |
| STAT3            | TATGCGGCCAGCAAAGAATCA     | CGGGCAATCTCCATTGGCT    |
| HSF1             | GCCTTCCTGACCAAGCTGT       | AAGTACTTGGGCAGCACCTC   |
| HSP27            | CTACATCTCCCGGTGCTTCA      | GGATGGTGATCTCGTTGGAC   |
| TGF- $\beta$ 1   | CAAGGGCTACCATGCCAACT      | AGGGCCAGGACCTTGCTG     |
| GRP78            | CTTGCCGTTCAAGGTGGTTG      | GCATGGGTAACCTTCTTTCC   |
| $\beta$ -actin   | ACTCTCCAGCCTTCCTTC        | ATCTCCTTCTGCATCCTGTC   |
| E4orfB region    | CGTGGTCAAACCTCTACAGCC     | GCATGAGCATGACTACGATG   |

### A549

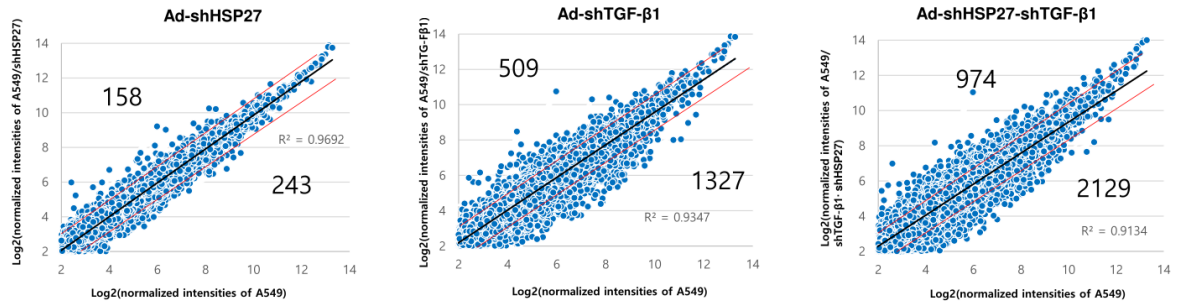

### SNU-398

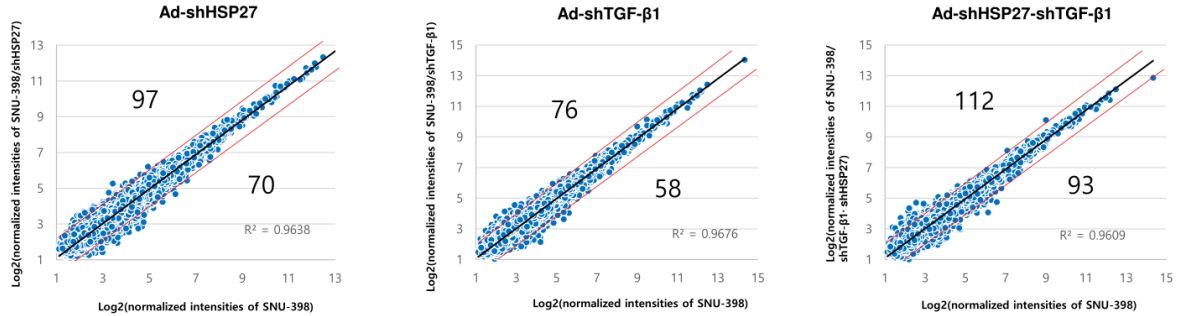

### MDA-MB-231

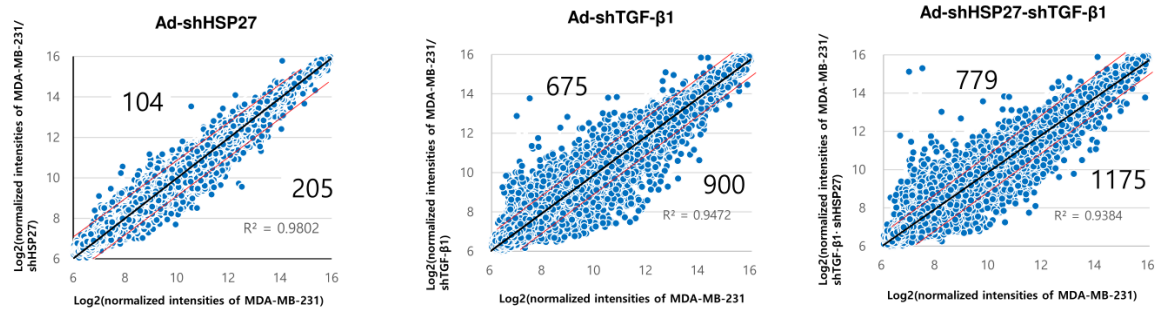

### MIA PaCa-2

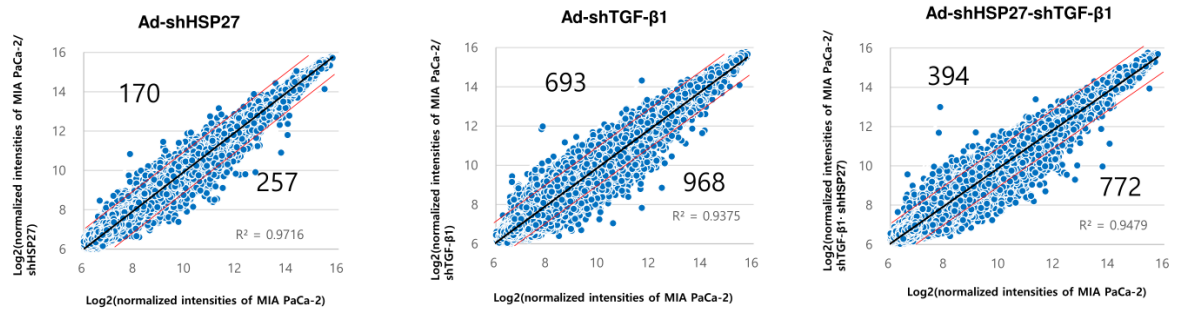

**Figure S1** Scatter plots of relative probe set intensities after downregulation of HSP27, TGF- $\beta$ 1 or HSP27-TGF- $\beta$ 1 compared to before downregulation of HSP27, TGF- $\beta$ 1 or HSP27-TGF- $\beta$ 1, respectively, from four different cancer cells (A549, SNU-398, MDA-MB-231, MIA PaCa-2) Normalized probe set intensities of before or after downregulation of HSP27, TGF- $\beta$ 1 or HSP27-TGF- $\beta$ 1 are plotted. The numbers indicate over 2-fold variation in intensities outside of two diagonal lines (red).

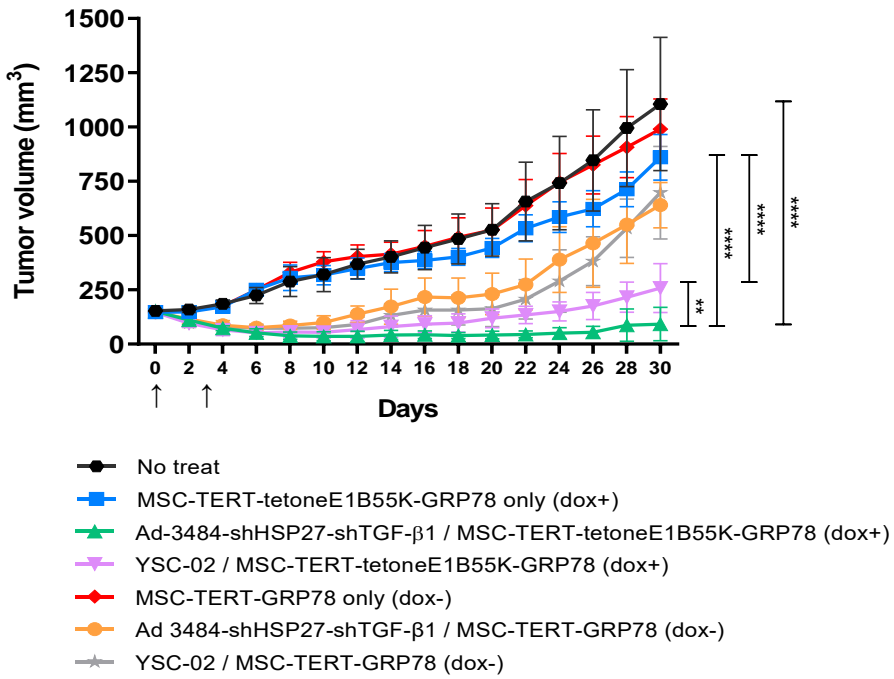

**Figure S2 Tumor volume measurement in A549 xenograft models**

$8 \times 10^6$  A549 cells were implanted subcutaneously in the flank region of BALB/c athymic nude mice, and either MSC-TERT-GRP78 or MSC-TERT-tetoneE1B55K-GRP78 loaded with oncolytic adenovirus was injected intravenously twice with an interval of 3 days. Tumor volume was monitored and recorded every 2 days until the end of the study. Arrows indicate when the MSC or oncolytic adenovirus/MSC complex was administered. Error bars represent mean  $\pm$  SD from 10 mice per group: \*\* $P < 0.01$ , \*\*\*\* $P < 0.0001$ .
